# Supplementary material
Source: PubMed Central journal article supplement (PMC10560596)
Supplement: djad097_supplementary_data.pdf [file djad097_supplementary_data.pdf]

**Supplementary Figure 1. Bar graph depicting average annual NCI funding (in millions of US dollars) between 2014-2018**

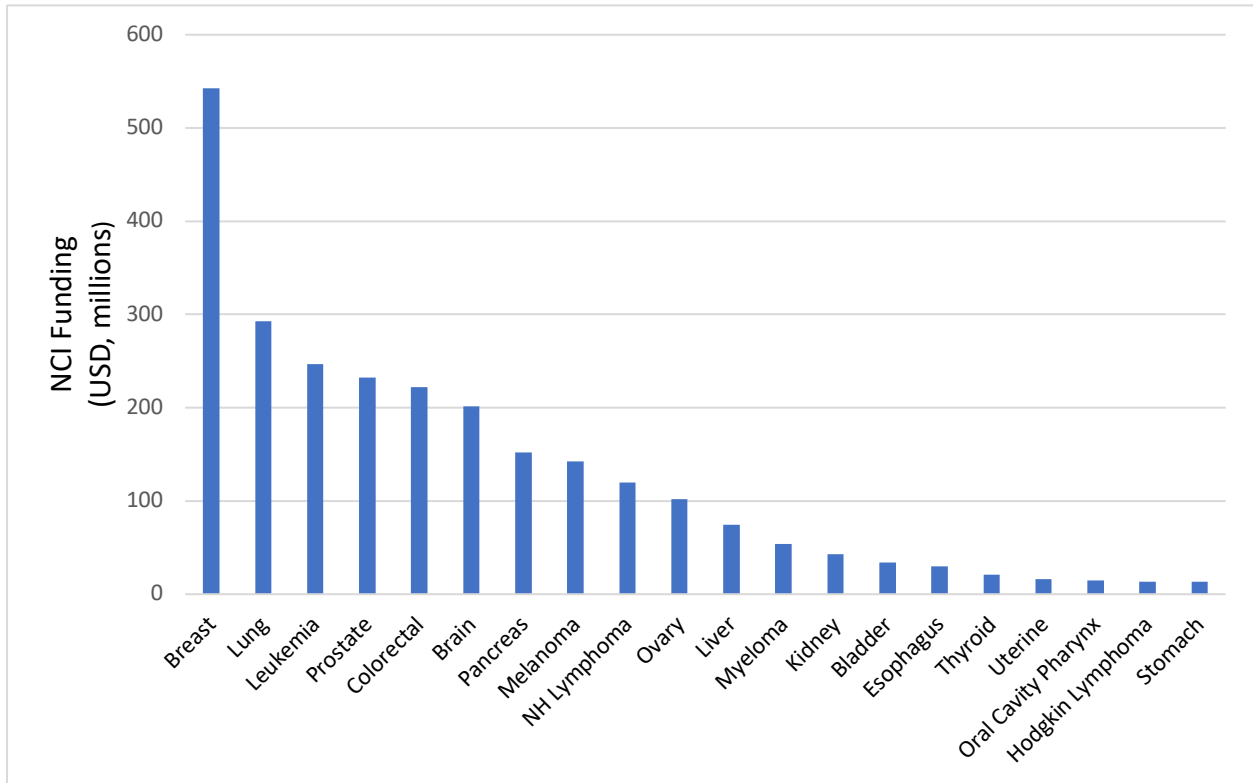

Supplementary Figure 2. Funding-to-lethality time trends 2014-2018 for (A) higher funded and (B) lower funded cancer sites.

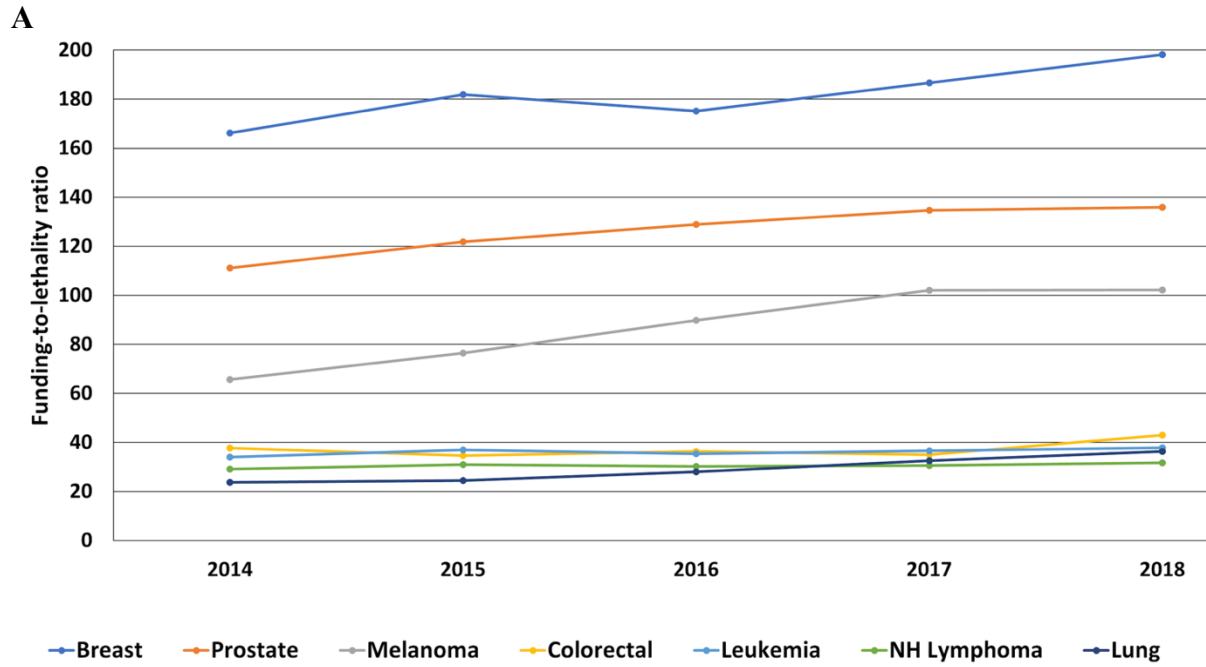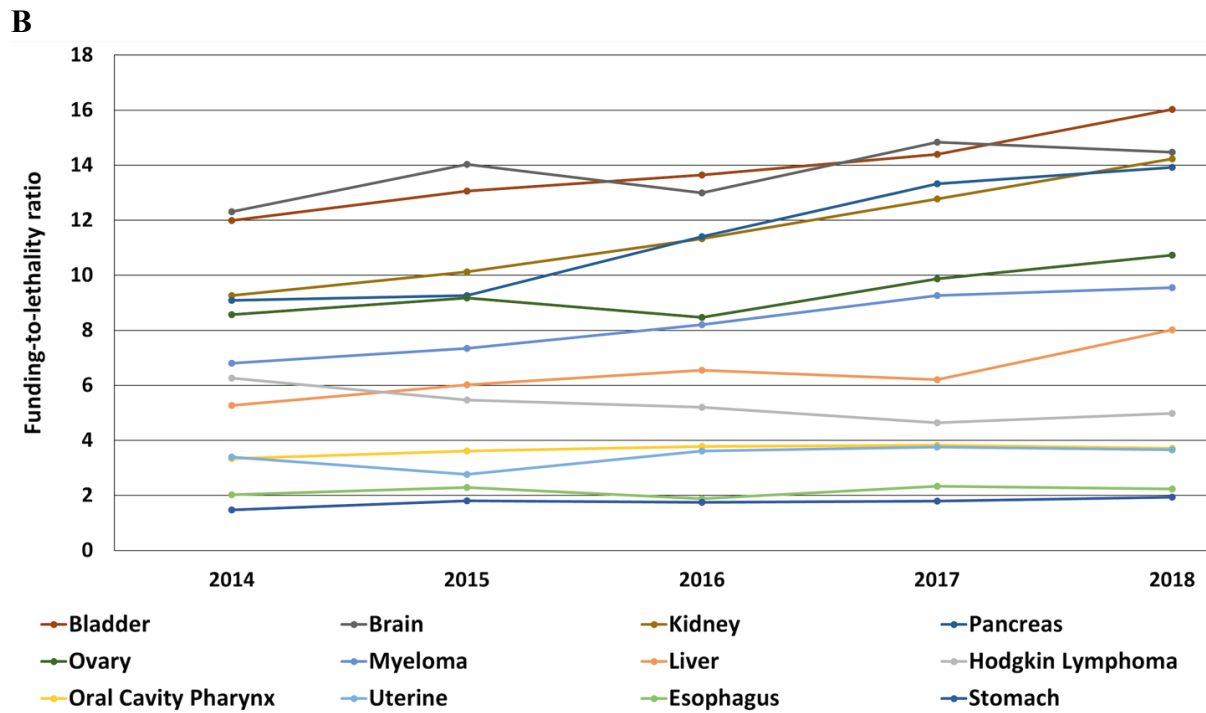

Cancer sites were divided into highly funded and lower funded cancers for ease of visualization.

| **FIGURE LEGENDS:**

**Supplementary Figure 1:** Bar graph depicting average annual NCI funding (in millions of US dollars) between 2014-2018

**Supplementary Figure 2:** Funding-to-lethality time trends 2014-2018 for (A) higher funded and (B) lower funded cancer sites. Cancer sites were divided into highly funded and lower funded cancers for ease of visualization.
